# Supplementary material
Source: PubMed Central journal article supplement (PMC5538278)
Supplement: 10.1194_M074534_jlr.M074534-1.pdf [file 10.1194_M074534_jlr.M074534-1.pdf]

## **SUPPLEMENTAL INFORMATION:**

### **Effect of iron on cholesterol 7-alpha-hydroxylase expression in alcohol-induced hepatic steatosis in mouse**

Huan Liang<sup>1,2,3,#</sup>, Hui Huang<sup>1,2,#</sup>, Pei-zhu Tan<sup>1,2,4,#</sup>, Ying Liu<sup>5</sup>, Jun-hui Nie<sup>1,2</sup>, Yi-tong Zhang<sup>6</sup>,  
Kai-li Zhang<sup>1,2</sup>, Yan Diao<sup>1,2</sup>, Qi He<sup>1,2</sup>, Bao-yu Hou<sup>1,2</sup>, Ting-ting Zhao<sup>1,2</sup>, Yan-ze Li<sup>1,2</sup>, Gui-xiang Lv<sup>1,2</sup>,  
Ki-Young Lee<sup>7</sup>, Xu Gao<sup>1,2,\*</sup>, Ling-yun Zhou<sup>1,2,\*</sup>

<sup>1</sup>Department of Biochemistry and Molecular Biology, Harbin Medical University, Harbin, China.

<sup>2</sup>Translational Medicine Center of Northern China, Harbin, China.

<sup>3</sup>Department of Clinical Laboratory, Harbin Medical University Cancer Hospital, Harbin, China.

<sup>4</sup>Teaching Experiment Center of Biotechnology, Harbin Medical University, Harbin, China.

<sup>5</sup>Department of Gastroenterology, Heilongjiang Province Hospital, Harbin, China.

<sup>6</sup>Department of Neurology, The First Affiliated Hospital of Harbin Medical University, Harbin, China.

<sup>7</sup>Department of Cell Biology and Anatomy, Arnie Charbonneau Cancer Institute, Hotchkiss Brain Institute, University of Calgary Calgary, AB, Canada.

<sup>#</sup>Huan Liang, Hui Huang and Peizhu Tan contributed equally to this work.

**Supplemental Table S1. Changes in ROS and SOD in liver tissue and MDA and GSH levels in serum.**

|                            | 9-month    |                 | 12-month   |                 |
|----------------------------|------------|-----------------|------------|-----------------|
|                            | Control    | Alcohol-treated | Control    | Alcohol-treated |
| ROS (fluorescence/mg prot) | 36.32±2.78 | 36.02±2.94      | 36.43±2.11 | 42.01±3.78*     |
| MDA (μM)                   | 2.84±0.24  | 3.08±0.19       | 2.87±0.45  | 3.67±0.36*      |
| GSH (μM)                   | 15.06±2.25 | 15.65±2.46      | 11.31±1.8  | 6.78±1.35**     |
| SOD (U/ mg prot)           | 98.81±4.25 | 99.36±8.09      | 98.35±5.49 | 90.23±3.68*     |

Data are shown as the means ±SD (n ≥ 6). \* $p < 0.05$  vs. control, \*\* $p < 0.01$  vs. control

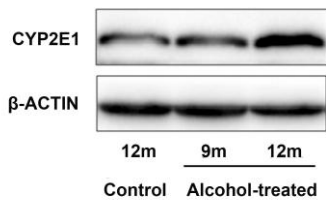

**Supplemental Figure S1.** CYP2E1 protein expression significantly increased in the alcohol-treated 12-month-old mouse compared to the control group. 9-month-old alcohol-treated mouse showed no significant change.

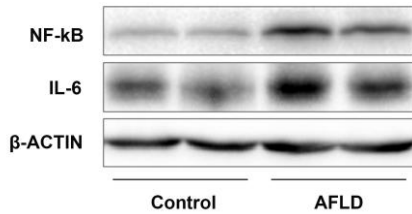

**Supplemental Figure S2.** The expression of inflammatory cytokines NF- $\kappa$ B and IL-6 increased significantly in alcohol-treated 12-month-old mouse.

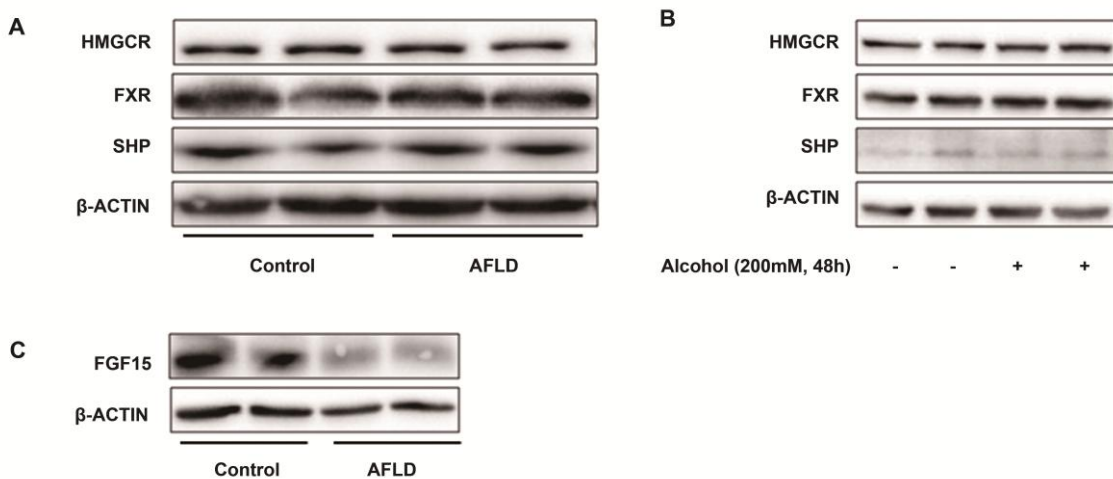

**Supplemental Figure S3.** Expression of HMGCR, FXR and SHP protein. **(A)** HMGCR, FXR and SHP protein expression in hepatic were no change in alcohol-treated 12-month-old mouse compared to control mouse. **(B)** HMGCR, FXR and SHP protein expression in alcohol-treated Hepa1-6 cell were no change. **(C)** Expression of FGF15 protein in ileum was suppressed in the alcohol-treated 12-month-old mouse.

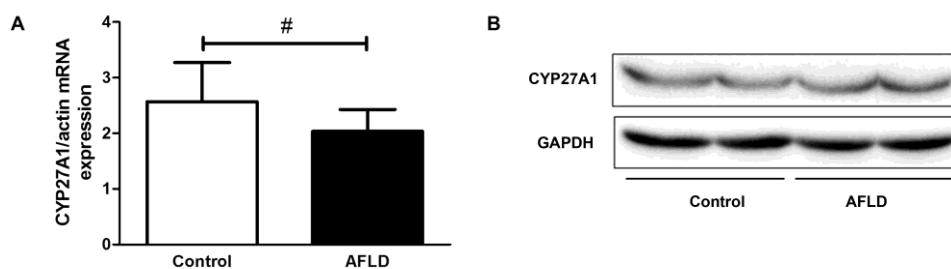

**Supplemental Figure S4.** Expression of CYP27A1. **(A)** Real time PCR analysis of the CYP27A1 mRNA levels. **(B)** Western blot analysis of CYP27A1 protein in alcohol-treated 12-month-old mouse showed there is no significant change in 12-month-old alcohol-treated mouse compared to control mouse.
